# Supplementary material for: Chiral Zn(II)-Bisamidine Complex as a Lewis-Brønsted Combined Acid Catalyst: Application to Asymmetric Mukaiyama Aldol Reactions of α-Ketoesters
Source: Molecules. 2012 Jul 30;17(8):9010–22. doi: 10.3390/molecules17089010 (PMC6268631; doi:10.3390/molecules17089010)

Article

# Chiral Zn(II)-Bisamidine Complex as a Lewis-Brønsted Combined Acid Catalyst: Application to Asymmetric Mukaiyama Aldol Reactions of $\alpha$ -Ketoesters

Ryo Gotoh and Masahiro Yamanaka \*

Department of Chemistry and Research Center for Smart Molecules, Rikkyo University,  
Toshima-Ku, Tokyo 171-8501, Japan

\* Author to whom correspondence should be addressed; E-Mail: myamanak@rikkyo.ac.jp;  
Tel./Fax: +81-3-3985-2395.

Received: 11 July 2012; in revised form: 21 July 2012 / Accepted: 21 July 2012 /

Published: 30 July 2012

---

## Supporting Information

|                                                              |    |
|--------------------------------------------------------------|----|
| Cartesian coordinates of stationary points                   | S2 |
| Scanned images of $^1\text{H}$ -NMR and $^{13}\text{C}$ -NMR | S6 |

Cartesian coordinates of **A** and **B**

**A:** SCF Done: E(RB+HF-LYP) = −2859.66791556 a.u.

Sum of electronic and thermal Free Energies = −2858.813119 a.u.

| Center<br>Number | Atomic<br>Number | Atomic<br>Type | Coordinates (Angstroms) |           |           |
|------------------|------------------|----------------|-------------------------|-----------|-----------|
|                  |                  |                | X                       | Y         | Z         |
| 1                | 1                | 0              | −0.793490               | 4.319822  | −1.396537 |
| 2                | 6                | 0              | −1.314772               | 3.384689  | −1.232854 |
| 3                | 6                | 0              | −2.615822               | 0.964551  | −0.817690 |
| 4                | 6                | 0              | −0.696890               | 2.331518  | −0.579421 |
| 5                | 6                | 0              | −2.616712               | 3.191747  | −1.725830 |
| 6                | 6                | 0              | −3.274055               | 1.991932  | −1.527067 |
| 7                | 1                | 0              | −3.117249               | 3.998976  | −2.251785 |
| 8                | 1                | 0              | −4.293664               | 1.841549  | −1.857610 |
| 9                | 6                | 0              | 0.695532                | 2.395568  | −0.062622 |
| 10               | 6                | 0              | 3.254500                | 2.288534  | 0.986769  |
| 11               | 6                | 0              | 1.310407                | 3.574517  | 0.326342  |
| 12               | 7                | 0              | 1.332084                | 1.195198  | 0.068675  |
| 13               | 6                | 0              | 2.601316                | 1.122135  | 0.536853  |
| 14               | 6                | 0              | 2.603265                | 3.503404  | 0.872187  |
| 15               | 1                | 0              | 0.791166                | 4.522283  | 0.254758  |
| 16               | 1                | 0              | 3.101126                | 4.412986  | 1.194058  |
| 17               | 1                | 0              | 4.266555                | 2.220637  | 1.364837  |
| 18               | 7                | 0              | 3.161491                | −0.136480 | 0.542660  |
| 19               | 1                | 0              | 3.143026                | −0.633849 | −0.363340 |
| 20               | 7                | 0              | −3.186994               | −0.246827 | −0.503535 |
| 21               | 1                | 0              | −3.104376               | −0.534046 | 0.484366  |
| 22               | 7                | 0              | −1.334795               | 1.135582  | −0.409105 |
| 23               | 30               | 0              | 0.009840                | −0.350665 | −0.011841 |
| 24               | 8                | 0              | −0.099156               | −1.852801 | 1.482292  |
| 25               | 6                | 0              | −0.114567               | −3.017123 | 1.064603  |
| 26               | 6                | 0              | −0.077109               | −3.144468 | −0.466161 |
| 27               | 8                | 0              | 0.027329                | −2.116359 | −1.152407 |
| 28               | 8                | 0              | −0.165628               | −4.357054 | −0.917472 |
| 29               | 6                | 0              | −0.176568               | −4.574895 | −2.367114 |
| 30               | 1                | 0              | 0.774215                | −4.240286 | −2.784271 |
| 31               | 1                | 0              | −0.305919               | −5.648223 | −2.483252 |
| 32               | 1                | 0              | −1.008001               | −4.020315 | −2.804220 |

|    |   |   |           |           |           |
|----|---|---|-----------|-----------|-----------|
| 33 | 6 | 0 | 4.399570  | −0.420924 | 1.219634  |
| 34 | 6 | 0 | 5.610500  | −0.370247 | 0.535011  |
| 35 | 6 | 0 | 4.319817  | −0.838057 | 2.571044  |
| 36 | 6 | 0 | 6.789004  | −0.862065 | 1.203310  |
| 37 | 6 | 0 | 5.704996  | 0.242146  | −0.831700 |
| 38 | 6 | 0 | 5.450794  | −1.236978 | 3.239919  |
| 39 | 1 | 0 | 3.349892  | −0.839750 | 3.060337  |
| 40 | 6 | 0 | 6.703183  | −1.286409 | 2.572845  |
| 41 | 6 | 0 | 5.081428  | −0.318299 | −1.953080 |
| 42 | 6 | 0 | 6.436257  | 1.476899  | −0.977019 |
| 43 | 1 | 0 | 5.394629  | −1.547595 | 4.279653  |
| 44 | 6 | 0 | 5.221012  | 0.297626  | −3.225677 |
| 45 | 6 | 0 | 6.551342  | 2.087832  | −2.269703 |
| 46 | 6 | 0 | 5.939051  | 1.458137  | −3.379190 |
| 47 | 1 | 0 | 4.775585  | −0.160642 | −4.100311 |
| 48 | 1 | 0 | 6.044458  | 1.904311  | −4.364572 |
| 49 | 6 | 0 | −4.468143 | −0.653487 | −1.019694 |
| 50 | 6 | 0 | −5.628895 | −0.425428 | −0.288572 |
| 51 | 6 | 0 | −4.480799 | −1.370785 | −2.241333 |
| 52 | 6 | 0 | −6.853107 | −1.028651 | −0.750989 |
| 53 | 6 | 0 | −5.624194 | 0.478513  | 0.909826  |
| 54 | 6 | 0 | −5.655914 | −1.888790 | −2.727487 |
| 55 | 1 | 0 | −3.545764 | −1.500420 | −2.779400 |
| 56 | 6 | 0 | −6.861647 | −1.756480 | −1.989570 |
| 57 | 6 | 0 | −4.936942 | 0.162456  | 2.088866  |
| 58 | 6 | 0 | −6.322235 | 1.736242  | 0.817093  |
| 59 | 1 | 0 | −5.671787 | −2.428509 | −3.670514 |
| 60 | 6 | 0 | −4.978215 | 1.053398  | 3.194868  |
| 61 | 6 | 0 | −6.340374 | 2.624502  | 1.943173  |
| 62 | 6 | 0 | −5.664362 | 2.240934  | 3.126116  |
| 63 | 1 | 0 | −4.481318 | 0.788976  | 4.120277  |
| 64 | 1 | 0 | −5.695778 | 2.899885  | 3.989795  |
| 65 | 7 | 0 | −4.148875 | −1.044348 | 2.163813  |
| 66 | 7 | 0 | 4.258878  | −1.497489 | −1.808269 |
| 67 | 6 | 0 | −4.938163 | −2.293639 | 2.178880  |
| 68 | 1 | 0 | −4.269024 | −3.144327 | 2.008714  |
| 69 | 1 | 0 | −5.440584 | −2.436662 | 3.147489  |
| 70 | 1 | 0 | −5.690610 | −2.284962 | 1.392394  |
| 71 | 6 | 0 | −3.145545 | −1.080395 | 3.232279  |

|     |   |   |            |           |           |
|-----|---|---|------------|-----------|-----------|
| 72  | 1 | 0 | −2.482829  | −1.934445 | 3.056613  |
| 73  | 1 | 0 | −2.544176  | −0.166782 | 3.223343  |
| 74  | 1 | 0 | −3.579033  | −1.203629 | 4.236910  |
| 75  | 6 | 0 | 5.007444   | −2.732541 | −1.493770 |
| 76  | 1 | 0 | 5.703773   | −2.564201 | −0.674460 |
| 77  | 1 | 0 | 4.301192   | −3.514090 | −1.192295 |
| 78  | 1 | 0 | 5.570153   | −3.092250 | −2.368536 |
| 79  | 6 | 0 | 3.326592   | −1.755352 | −2.909718 |
| 80  | 1 | 0 | 2.627005   | −2.535622 | −2.589547 |
| 81  | 1 | 0 | 2.755533   | −0.853559 | −3.147921 |
| 82  | 1 | 0 | 3.819078   | −2.110683 | −3.828368 |
| 83  | 6 | 0 | −7.019839  | 3.869036  | 1.854069  |
| 84  | 1 | 0 | −7.030333  | 4.518358  | 2.725650  |
| 85  | 6 | 0 | −6.976475  | 2.171752  | −0.373216 |
| 86  | 1 | 0 | −6.980464  | 1.531116  | −1.247296 |
| 87  | 6 | 0 | −7.651138  | 4.248474  | 0.691641  |
| 88  | 1 | 0 | −8.171074  | 5.199804  | 0.633406  |
| 89  | 6 | 0 | −7.618753  | 3.390225  | −0.432098 |
| 90  | 1 | 0 | −8.113075  | 3.691313  | −1.351345 |
| 91  | 6 | 0 | −8.067402  | −0.947978 | −0.013088 |
| 92  | 1 | 0 | −8.079998  | −0.416365 | 0.931842  |
| 93  | 6 | 0 | −8.072882  | −2.340044 | −2.448860 |
| 94  | 1 | 0 | −8.066409  | −2.880020 | −3.391995 |
| 95  | 6 | 0 | −9.230656  | −2.232815 | −1.712978 |
| 96  | 1 | 0 | −10.150622 | −2.684587 | −2.071329 |
| 97  | 6 | 0 | −9.221890  | −1.537280 | −0.480592 |
| 98  | 1 | 0 | −10.135709 | −1.466708 | 0.101863  |
| 99  | 6 | 0 | 7.868798   | −1.761472 | 3.231412  |
| 100 | 1 | 0 | 7.790874   | −2.070937 | 4.270271  |
| 101 | 6 | 0 | 8.047591   | −0.966470 | 0.547366  |
| 102 | 1 | 0 | 8.130662   | −0.666732 | −0.491289 |
| 103 | 6 | 0 | 9.072082   | −1.838870 | 2.567610  |
| 104 | 1 | 0 | 9.956402   | −2.206456 | 3.079189  |
| 105 | 6 | 0 | 9.156331   | −1.445386 | 1.211234  |
| 106 | 1 | 0 | 10.105257  | −1.520845 | 0.688615  |
| 107 | 6 | 0 | 7.029061   | 2.159911  | 0.125727  |
| 108 | 1 | 0 | 6.961231   | 1.733396  | 1.119600  |
| 109 | 6 | 0 | 7.262142   | 3.309579  | −2.417424 |
| 110 | 1 | 0 | 7.345327   | 3.744319  | −3.410110 |

|     |   |   |           |           |           |
|-----|---|---|-----------|-----------|-----------|
| 111 | 6 | 0 | 7.831854  | 3.931537  | −1.330907 |
| 112 | 1 | 0 | 8.376339  | 4.862929  | −1.452486 |
| 113 | 6 | 0 | 7.703607  | 3.349487  | −0.047937 |
| 114 | 1 | 0 | 8.149623  | 3.842311  | 0.811315  |
| 115 | 6 | 0 | −0.158405 | −4.216974 | 1.936850  |
| 116 | 1 | 0 | −0.179964 | −3.922942 | 2.986890  |
| 117 | 1 | 0 | −1.035992 | −4.829724 | 1.692045  |
| 118 | 1 | 0 | 0.716041  | −4.852463 | 1.741836  |

**B:** SCF Done: E(RB+HF-LYP) = −3765.23527528 a.u.

Sum of electronic and thermal Free Energies = −3764.272160 a.u.

| Center<br>Number | Atomic<br>Number | Atomic<br>Type | Coordinates (Angstroms) |           |           |
|------------------|------------------|----------------|-------------------------|-----------|-----------|
|                  |                  |                | X                       | Y         | Z         |
| 1                | 1                | 0              | 0.702286                | −1.198463 | 4.591921  |
| 2                | 6                | 0              | 1.245530                | −1.202579 | 3.656735  |
| 3                | 6                | 0              | 2.587429                | −1.236381 | 1.236493  |
| 4                | 6                | 0              | 0.735962                | −0.568837 | 2.532852  |
| 5                | 6                | 0              | 2.466873                | −1.882278 | 3.552457  |
| 6                | 6                | 0              | 3.150533                | −1.893853 | 2.357066  |
| 7                | 1                | 0              | 2.877812                | −2.393905 | 4.417395  |
| 8                | 1                | 0              | 4.103796                | −2.395080 | 2.255809  |
| 9                | 6                | 0              | −0.540931               | 0.196570  | 2.606816  |
| 10               | 6                | 0              | −2.961661               | 1.520012  | 2.691632  |
| 11               | 6                | 0              | −1.012193               | 0.671507  | 3.822263  |
| 12               | 7                | 0              | −1.222983               | 0.409130  | 1.440363  |
| 13               | 6                | 0              | −2.434656               | 1.023061  | 1.475581  |
| 14               | 6                | 0              | −2.237955               | 1.351745  | 3.851194  |
| 15               | 1                | 0              | −0.437759               | 0.545188  | 4.729908  |
| 16               | 1                | 0              | −2.619809               | 1.739615  | 4.790585  |
| 17               | 1                | 0              | −3.919264               | 2.023688  | 2.688698  |
| 18               | 7                | 0              | −3.114163               | 1.180652  | 0.295362  |
| 19               | 1                | 0              | −2.770851               | 0.642673  | −0.490616 |
| 20               | 7                | 0              | 3.234369                | −1.237577 | 0.025013  |
| 21               | 1                | 0              | 2.905529                | −0.572748 | −0.667077 |
| 22               | 7                | 0              | 1.378924                | −0.624695 | 1.325684  |
| 23               | 30               | 0              | 0.061252                | 0.000725  | −0.191727 |
| 24               | 8                | 0              | 1.190021                | −0.432016 | −2.111923 |

|    |   |   |           |           |           |
|----|---|---|-----------|-----------|-----------|
| 25 | 6 | 0 | 0.599648  | −0.209851 | −3.163002 |
| 26 | 6 | 0 | −0.784402 | 0.454351  | −2.985846 |
| 27 | 8 | 0 | −1.237502 | 0.578850  | −1.848205 |
| 28 | 8 | 0 | −1.352411 | 0.843916  | −4.084904 |
| 29 | 6 | 0 | −2.622297 | 1.574338  | −3.987804 |
| 30 | 1 | 0 | −2.400621 | 2.573912  | −3.612890 |
| 31 | 1 | 0 | −2.999465 | 1.609651  | −5.007280 |
| 32 | 1 | 0 | −3.298174 | 1.042852  | −3.316467 |
| 33 | 6 | 0 | −4.527408 | 1.472248  | 0.251518  |
| 34 | 6 | 0 | −5.453087 | 0.434738  | 0.277685  |
| 35 | 6 | 0 | −4.926061 | 2.828970  | 0.179617  |
| 36 | 6 | 0 | −6.851442 | 0.763715  | 0.278438  |
| 37 | 6 | 0 | −4.962108 | −0.982037 | 0.383410  |
| 38 | 6 | 0 | −6.261294 | 3.154970  | 0.167612  |
| 39 | 1 | 0 | −4.160621 | 3.598547  | 0.136265  |
| 40 | 6 | 0 | −7.253696 | 2.141600  | 0.224098  |
| 41 | 6 | 0 | −4.449339 | −1.679626 | −0.720993 |
| 42 | 6 | 0 | −4.935919 | −1.587950 | 1.688759  |
| 43 | 1 | 0 | −6.571905 | 4.194913  | 0.116799  |
| 44 | 6 | 0 | −3.842146 | −2.956317 | −0.505172 |
| 45 | 6 | 0 | −4.318859 | −2.869476 | 1.878131  |
| 46 | 6 | 0 | −3.764719 | −3.520055 | 0.750680  |
| 47 | 1 | 0 | −3.493470 | −3.533591 | −1.351275 |
| 48 | 1 | 0 | −3.325384 | −4.507934 | 0.872134  |
| 49 | 6 | 0 | 4.651769  | −1.509626 | −0.060012 |
| 50 | 6 | 0 | 5.565240  | −0.473726 | 0.092949  |
| 51 | 6 | 0 | 5.064278  | −2.844594 | −0.286872 |
| 52 | 6 | 0 | 6.967806  | −0.783076 | 0.043795  |
| 53 | 6 | 0 | 5.066999  | 0.920684  | 0.346330  |
| 54 | 6 | 0 | 6.402883  | −3.152865 | −0.333243 |
| 55 | 1 | 0 | 4.308507  | −3.613066 | −0.418984 |
| 56 | 6 | 0 | 7.384872  | −2.141479 | −0.165912 |
| 57 | 6 | 0 | 4.502586  | 1.697056  | −0.679016 |
| 58 | 6 | 0 | 5.096587  | 1.424135  | 1.693045  |
| 59 | 1 | 0 | 6.724204  | −4.176745 | −0.503107 |
| 60 | 6 | 0 | 3.922052  | 2.961494  | −0.346020 |
| 61 | 6 | 0 | 4.504573  | 2.695331  | 2.001601  |
| 62 | 6 | 0 | 3.915932  | 3.435242  | 0.949745  |
| 63 | 1 | 0 | 3.548550  | 3.603043  | −1.134556 |

|     |   |   |            |           |           |
|-----|---|---|------------|-----------|-----------|
| 64  | 1 | 0 | 3.501511   | 4.418531  | 1.162548  |
| 65  | 6 | 0 | 5.719943   | 0.943249  | −2.695483 |
| 66  | 1 | 0 | 5.526917   | 0.333869  | −3.583938 |
| 67  | 1 | 0 | 6.218799   | 1.872259  | −3.013060 |
| 68  | 1 | 0 | 6.394743   | 0.393112  | −2.047638 |
| 69  | 6 | 0 | 3.575504   | 1.971092  | −2.939152 |
| 70  | 1 | 0 | 3.488747   | 1.392701  | −3.864553 |
| 71  | 1 | 0 | 2.576370   | 2.106516  | −2.518010 |
| 72  | 1 | 0 | 3.971902   | 2.962846  | −3.213314 |
| 73  | 6 | 0 | −5.833290  | −0.901796 | −2.600103 |
| 74  | 1 | 0 | −6.454695  | −0.340836 | −1.908650 |
| 75  | 1 | 0 | −5.741241  | −0.320920 | −3.523366 |
| 76  | 1 | 0 | −6.338608  | −1.850602 | −2.839065 |
| 77  | 6 | 0 | −3.672027  | −1.825949 | −3.045084 |
| 78  | 1 | 0 | −3.669752  | −1.227703 | −3.961677 |
| 79  | 1 | 0 | −2.640833  | −1.940154 | −2.702747 |
| 80  | 1 | 0 | −4.058627  | −2.822208 | −3.315238 |
| 81  | 6 | 0 | 4.532142   | 3.189941  | 3.333787  |
| 82  | 1 | 0 | 4.092163   | 4.163100  | 3.537427  |
| 83  | 6 | 0 | 5.683035   | 0.695893  | 2.769837  |
| 84  | 1 | 0 | 6.145442   | −0.264079 | 2.572836  |
| 85  | 6 | 0 | 5.120465   | 2.463463  | 4.342075  |
| 86  | 1 | 0 | 5.152256   | 2.852912  | 5.355049  |
| 87  | 6 | 0 | 5.697801   | 1.203845  | 4.050290  |
| 88  | 1 | 0 | 6.169352   | 0.634852  | 4.846571  |
| 89  | 6 | 0 | 7.971319   | 0.215352  | 0.192455  |
| 90  | 1 | 0 | 7.673087   | 1.247063  | 0.346848  |
| 91  | 6 | 0 | 8.772543   | −2.444986 | −0.207256 |
| 92  | 1 | 0 | 9.076237   | −3.476347 | −0.365307 |
| 93  | 6 | 0 | 9.715608   | −1.454794 | −0.053282 |
| 94  | 1 | 0 | 10.773324  | −1.697565 | −0.086390 |
| 95  | 6 | 0 | 9.308359   | −0.113635 | 0.146113  |
| 96  | 1 | 0 | 10.058787  | 0.662476  | 0.263867  |
| 97  | 6 | 0 | −8.638163  | 2.462688  | 0.231018  |
| 98  | 1 | 0 | −8.931310  | 3.508293  | 0.188973  |
| 99  | 6 | 0 | −7.865618  | −0.233547 | 0.340334  |
| 100 | 1 | 0 | −7.577186  | −1.278650 | 0.387459  |
| 101 | 6 | 0 | −9.591484  | 1.472381  | 0.292322  |
| 102 | 1 | 0 | −10.646372 | 1.729183  | 0.299282  |

|     |   |   |           |           |           |
|-----|---|---|-----------|-----------|-----------|
| 103 | 6 | 0 | −9.198871 | 0.113149  | 0.348148  |
| 104 | 1 | 0 | −9.957445 | −0.662263 | 0.399258  |
| 105 | 6 | 0 | −5.498018 | −0.955135 | 2.836327  |
| 106 | 1 | 0 | −5.984404 | 0.007020  | 2.727803  |
| 107 | 6 | 0 | −4.290657 | −3.463681 | 3.168717  |
| 108 | 1 | 0 | −3.830042 | −4.442002 | 3.281551  |
| 109 | 6 | 0 | −4.855303 | −2.826610 | 4.248742  |
| 110 | 1 | 0 | −4.846918 | −3.293113 | 5.229130  |
| 111 | 6 | 0 | −5.463659 | −1.560238 | 4.073526  |
| 112 | 1 | 0 | −5.920302 | −1.064223 | 4.925366  |
| 113 | 7 | 0 | −4.484778 | −1.133504 | −2.043683 |
| 114 | 7 | 0 | 4.438552  | 1.229657  | −2.022766 |
| 115 | 6 | 0 | 0.113447  | 4.091582  | −1.523685 |
| 116 | 6 | 0 | 0.053296  | 3.261637  | −0.248864 |
| 117 | 6 | 0 | −0.178843 | −3.929830 | −2.083664 |
| 118 | 6 | 0 | 0.127339  | −3.248414 | −0.756106 |
| 119 | 6 | 0 | 1.117635  | −0.529450 | −4.518268 |
| 120 | 1 | 0 | 0.443801  | −1.249492 | −5.000511 |
| 121 | 1 | 0 | 1.112621  | 0.368225  | −5.147776 |
| 122 | 1 | 0 | 2.121634  | −0.949635 | −4.451249 |
| 123 | 9 | 0 | −0.255231 | 3.353949  | −2.605421 |
| 124 | 9 | 0 | 1.356110  | 4.548127  | −1.765559 |
| 125 | 9 | 0 | −0.719534 | 5.132833  | −1.427621 |
| 126 | 1 | 0 | 0.371509  | 3.883247  | 0.592923  |
| 127 | 1 | 0 | −0.979295 | 2.946270  | −0.093403 |
| 128 | 8 | 0 | 0.857895  | 2.085163  | −0.357247 |
| 129 | 1 | 0 | 1.797783  | 2.298708  | −0.150502 |
| 130 | 8 | 0 | −0.700435 | −2.101542 | −0.554979 |
| 131 | 1 | 0 | −1.608116 | −2.371088 | −0.288216 |
| 132 | 1 | 0 | 0.007021  | −3.978187 | 0.050239  |
| 133 | 1 | 0 | 1.162680  | −2.904436 | −0.775101 |
| 134 | 9 | 0 | 0.734019  | −4.872104 | −2.335063 |
| 135 | 9 | 0 | −1.398950 | −4.500629 | −2.080917 |
| 136 | 9 | 0 | −0.162606 | −3.034710 | −3.107720 |

---

Scanned images of  $^1\text{H}$ -NMR and  $^{13}\text{C}$ -NMR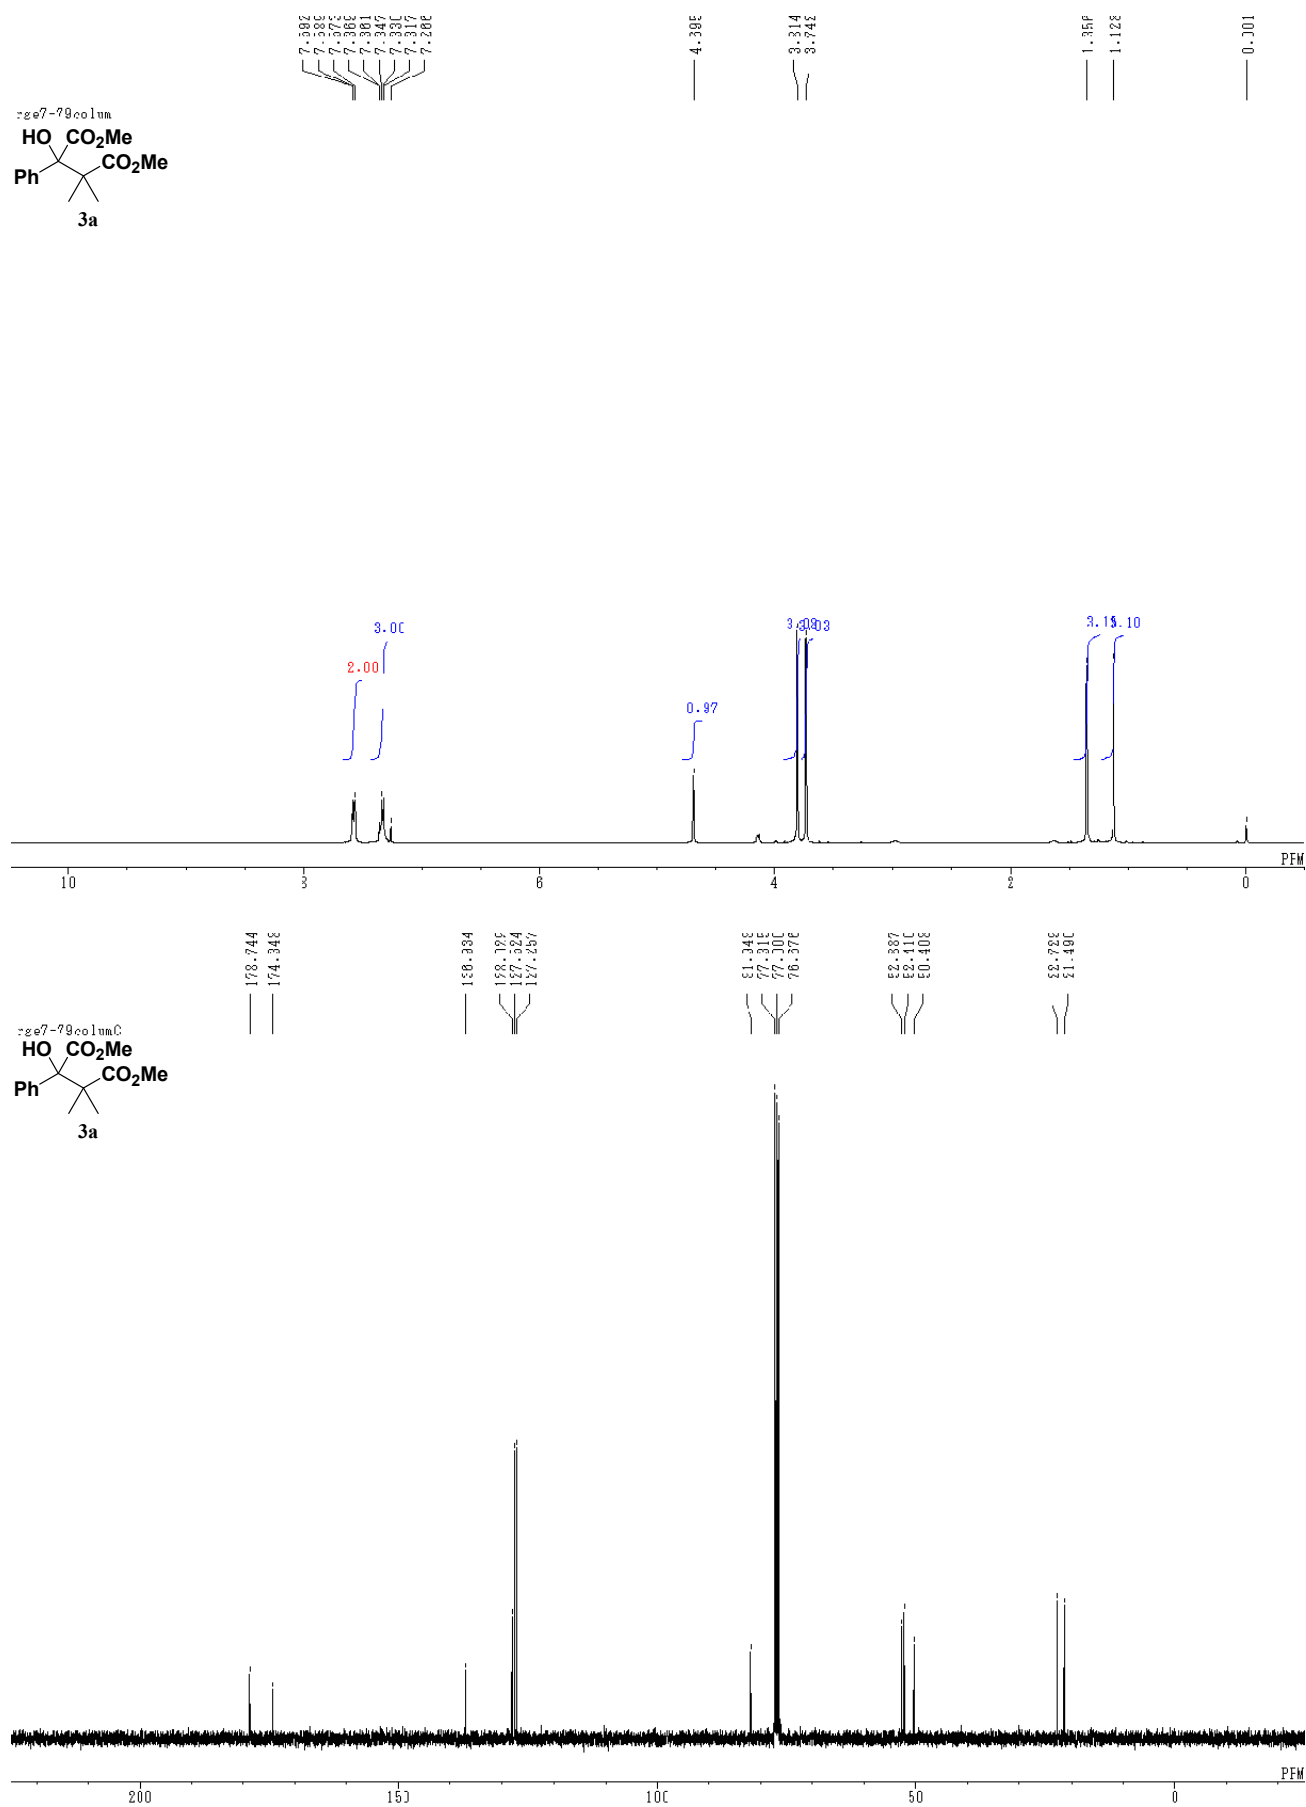

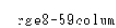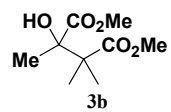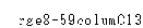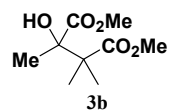

Supplement: Supplementary file 1 [file molecules-17-09010-s001.pdf]
